# Supplementary material for: Associations between seasonal meteorological conditions and the daily step count of adults in Yokohama, Japan: Results of year-round pedometer measurements in a large population
Source: PubMed Central journal article supplement — Prev Med Rep. 2017 Aug 5;8:15–7. doi: 10.1016/j.pmedr.2017.07.009 (PMC5555090; doi:10.1016/j.pmedr.2017.07.009), 2017-08-05
Supplement: mmc1.pdf [file mmc1.pdf]

**Supplemental Table 1** Median step counts per day in each month stratified according to sex and age groups (N = 24,625).

| Sex    | Age   | N     | Apr    | May    | Jun    | Jul    | Aug    | Sep    | Oct    | Nov    | Dec    | Jan    | Feb    | Mar    | Annual mean |
|--------|-------|-------|--------|--------|--------|--------|--------|--------|--------|--------|--------|--------|--------|--------|-------------|
| Male   | 40-44 | 341   | 9301.6 | 9332.7 | 9410.3 | 8889.6 | 8518.1 | 9016.8 | 9558.1 | 9481.7 | 9035.7 | 8698.2 | 9238.7 | 8993.1 | 9214.6      |
|        | 45-49 | 658   | 9016.3 | 9262.4 | 9232.7 | 8745.3 | 8485.4 | 8860.1 | 9272.1 | 8865.7 | 8688.1 | 8539.6 | 8712.9 | 8944.5 | 8892.6      |
|        | 50-54 | 735   | 9542.9 | 9683.8 | 9645.3 | 9255.0 | 8846.8 | 9296.1 | 9803.7 | 9495.4 | 9312.6 | 9084.4 | 9202.6 | 9450.8 | 9394.8      |
|        | 55-59 | 798   | 9635.3 | 9654.8 | 9645.6 | 9329.4 | 8867.0 | 9366.1 | 9701.5 | 9456.8 | 9235.5 | 9104.5 | 9306.4 | 9562.8 | 9445.5      |
|        | 60-64 | 1133  | 9810.3 | 9954.1 | 9714.3 | 9207.3 | 8781.3 | 9264.7 | 9738.9 | 9461.2 | 9396.9 | 9028.4 | 9339.6 | 9427.9 | 9511.0      |
|        | 65-69 | 2333  | 9555.7 | 9991.9 | 9633.6 | 8869.6 | 8619.2 | 9140.5 | 9849.4 | 9419.0 | 9175.6 | 9039.4 | 9293.3 | 9209.4 | 9365.6      |
|        | 70-74 | 2193  | 9210.7 | 9610.0 | 9353.1 | 8371.3 | 8305.5 | 8585.5 | 9326.8 | 8888.2 | 8786.4 | 8590.7 | 8974.4 | 8881.7 | 8958.3      |
|        | 75-79 | 2025  | 9030.9 | 9359.1 | 9142.5 | 8180.4 | 8028.0 | 8415.1 | 9097.4 | 8709.6 | 8436.2 | 8434.2 | 8706.1 | 8730.7 | 8688.2      |
|        | 80-   | 1191  | 7953.7 | 8175.9 | 8018.2 | 7181.8 | 7170.3 | 7555.7 | 8173.4 | 7750.7 | 7710.7 | 7638.6 | 7779.4 | 7808.4 | 7821.0      |
|        | Total | 11407 | 9206.4 | 9491.6 | 9326.2 | 8590.3 | 8400.2 | 8774.0 | 9395.3 | 9019.3 | 8838.4 | 8672.2 | 8962.1 | 8972.4 | 9000.1      |
| Female | 40-44 | 462   | 7209.0 | 7484.3 | 7199.7 | 6922.4 | 6750.3 | 7165.1 | 7455.9 | 7333.3 | 7013.2 | 6782.2 | 6875.6 | 6993.1 | 7193.2      |
|        | 45-49 | 954   | 7521.3 | 7679.5 | 7697.1 | 7300.8 | 7010.4 | 7403.5 | 7684.2 | 7545.6 | 7246.2 | 6989.3 | 7091.7 | 7350.4 | 7451.7      |
|        | 50-54 | 1004  | 7316.0 | 7556.8 | 7500.1 | 7003.4 | 6822.4 | 7120.0 | 7495.7 | 7250.5 | 7102.0 | 6883.7 | 6892.7 | 7201.7 | 7232.0      |
|        | 55-59 | 1174  | 7534.7 | 7707.1 | 7523.4 | 7103.2 | 6877.3 | 7322.5 | 7706.6 | 7485.1 | 7218.9 | 6860.3 | 7309.4 | 7339.1 | 7340.6      |
|        | 60-64 | 1520  | 7467.9 | 7686.2 | 7545.6 | 6900.5 | 6650.6 | 7242.1 | 7535.4 | 7309.6 | 7037.0 | 6821.1 | 7081.1 | 7186.6 | 7190.9      |
|        | 65-69 | 2831  | 7379.2 | 7558.5 | 7373.0 | 6688.7 | 6389.4 | 6894.5 | 7403.3 | 7161.0 | 6915.5 | 6661.1 | 6998.6 | 7040.1 | 7064.7      |
|        | 70-74 | 2494  | 7062.1 | 7224.8 | 7132.7 | 6357.0 | 6112.0 | 6643.0 | 7111.8 | 6852.1 | 6551.1 | 6320.5 | 6651.4 | 6633.7 | 6749.9      |
|        | 75-79 | 1930  | 6789.1 | 6854.1 | 6772.5 | 6029.7 | 5897.1 | 6359.1 | 6755.1 | 6495.9 | 6281.7 | 6085.7 | 6355.6 | 6435.5 | 6437.8      |
|        | 80-   | 849   | 6315.4 | 6346.8 | 6270.9 | 5630.5 | 5482.1 | 5891.8 | 6213.7 | 5905.0 | 5771.0 | 5469.9 | 5719.7 | 5845.1 | 5874.7      |
|        | Total | 13218 | 7187.8 | 7350.7 | 7225.1 | 6628.7 | 6373.8 | 6851.9 | 7268.1 | 6987.3 | 6788.3 | 6537.1 | 6792.6 | 6886.2 | 6938.9      |
