# Supplementary material for: Associations between seasonal meteorological conditions and the daily step count of adults in Yokohama, Japan: Results of year-round pedometer measurements in a large population
Source: PubMed Central journal article supplement — Prev Med Rep. 2017 Aug 5;8:15–7. doi: 10.1016/j.pmedr.2017.07.009 (PMC5555090; doi:10.1016/j.pmedr.2017.07.009), 2017-08-05
Supplement: mmc2.pdf [file mmc2.pdf]

**Supplemental Table 2** Coordinates of each point in Figs. 1 and 2 and Supplemental Fig. 1  
(Top: Fig. 1, Middle: Fig. 2, Bottom: Supplemental Fig. 1).

| Temp | M <65  | F <65  | M ≥65  | F ≥65  |
|------|--------|--------|--------|--------|
| 14.3 | 9538.2 | 7503.6 | 9017.5 | 6966.7 |
| 19.5 | 9689.3 | 7695.5 | 9380.5 | 7105.3 |
| 22.6 | 9643.1 | 7578.9 | 9138.2 | 6997.3 |
| 25.9 | 9259.1 | 7101.7 | 8194.5 | 6219.2 |
| 26.8 | 8867.8 | 6854.8 | 8061.5 | 6013.8 |
| 22.8 | 9251.5 | 7274.7 | 8462.4 | 6537.7 |
| 18.6 | 9709.7 | 7621.7 | 9177.6 | 6979.7 |
| 14.0 | 9412.1 | 7431.5 | 8754.1 | 6729.1 |
| 7.5  | 9206.3 | 7171.6 | 8587.5 | 6477.4 |
| 6.2  | 8983.2 | 6939.7 | 8480.6 | 6252.7 |
| 6.4  | 9217.3 | 7179.2 | 8780.4 | 6551.9 |
| 10.5 | 9386.0 | 7315.0 | 8690.5 | 6591.7 |

| THI  | M <65  | F <65  | M ≥65  | F ≥65  |
|------|--------|--------|--------|--------|
| 58.2 | 9538.2 | 7503.6 | 9017.5 | 6966.7 |
| 67.4 | 9689.3 | 7695.5 | 9380.5 | 7105.3 |
| 69.7 | 9643.1 | 7578.9 | 9138.2 | 6997.3 |
| 76.3 | 9259.1 | 7101.7 | 8194.5 | 6219.2 |
| 77.5 | 8867.8 | 6854.8 | 8061.5 | 6013.8 |
| 71.4 | 9251.5 | 7274.7 | 8462.4 | 6537.7 |
| 64.6 | 9709.7 | 7621.7 | 9177.6 | 6979.7 |
| 58.4 | 9412.1 | 7431.5 | 8754.1 | 6729.1 |
| 52.0 | 9206.3 | 7171.6 | 8587.5 | 6477.4 |
| 47.7 | 8983.2 | 6939.7 | 8480.6 | 6252.7 |
| 48.9 | 9217.3 | 7179.2 | 8780.4 | 6551.9 |
| 52.4 | 9386.0 | 7315.0 | 8690.5 | 6591.7 |

| NET  | M <65  | F <65  | M ≥65  | F ≥65  |
|------|--------|--------|--------|--------|
| 6.5  | 9538.2 | 9017.5 | 7503.6 | 6966.7 |
| 14.1 | 9689.3 | 9380.5 | 7695.5 | 7105.3 |
| 16.2 | 9643.1 | 9138.2 | 7578.9 | 6997.3 |
| 21.1 | 9259.1 | 8194.5 | 7101.7 | 6219.2 |
| 21.9 | 8867.8 | 8061.5 | 6854.8 | 6013.8 |
| 17.2 | 9251.5 | 8462.4 | 7274.7 | 6537.7 |
| 12.1 | 9709.7 | 9177.6 | 7621.7 | 6979.7 |
| 7.1  | 9412.1 | 8754.1 | 7431.5 | 6729.1 |
| 1.7  | 9206.3 | 8587.5 | 7171.6 | 6477.4 |
| -1.3 | 8983.2 | 8480.6 | 6939.7 | 6252.7 |
| -1.1 | 9217.3 | 8780.4 | 7179.2 | 6551.9 |
| 2.1  | 9386.0 | 8690.5 | 7315.0 | 6591.7 |
